# Supplementary material for: Direct Observation of the Dynamics of Single-Cell Metabolic Activity during Microbial Diauxic Growth
Source: PubMed Central journal article supplement (PMC7064762; doi:10.1128/mbio.01519-19), 2020-03-03

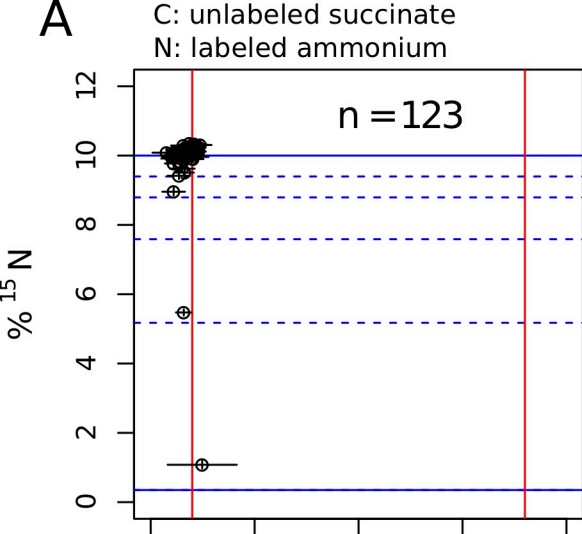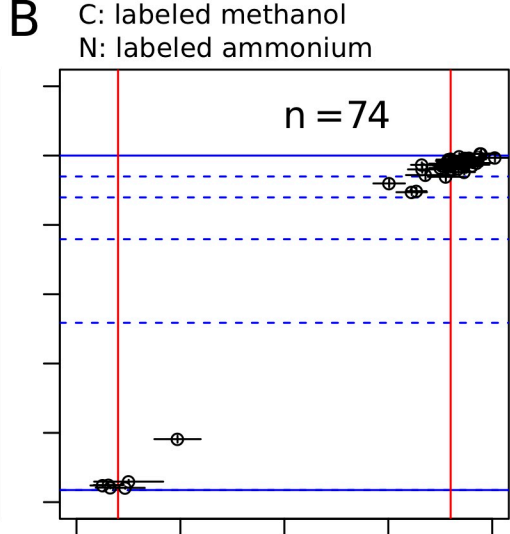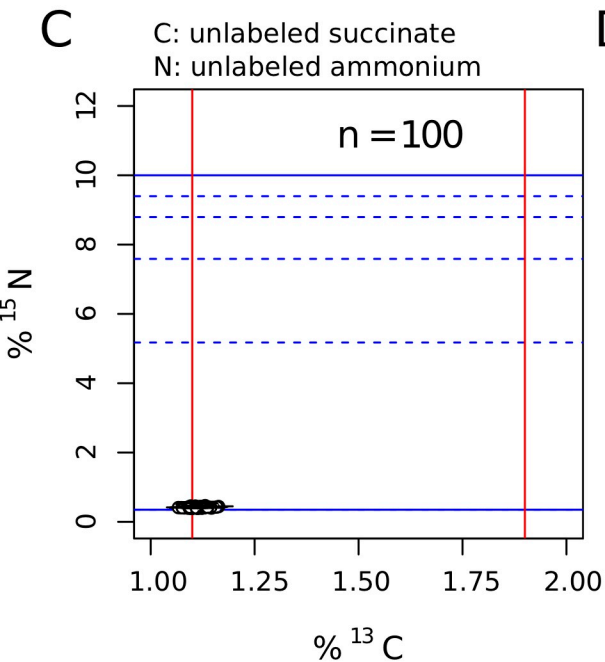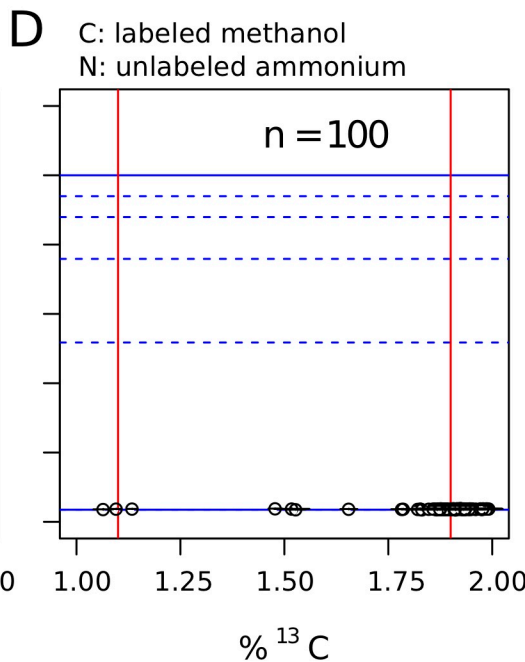

E

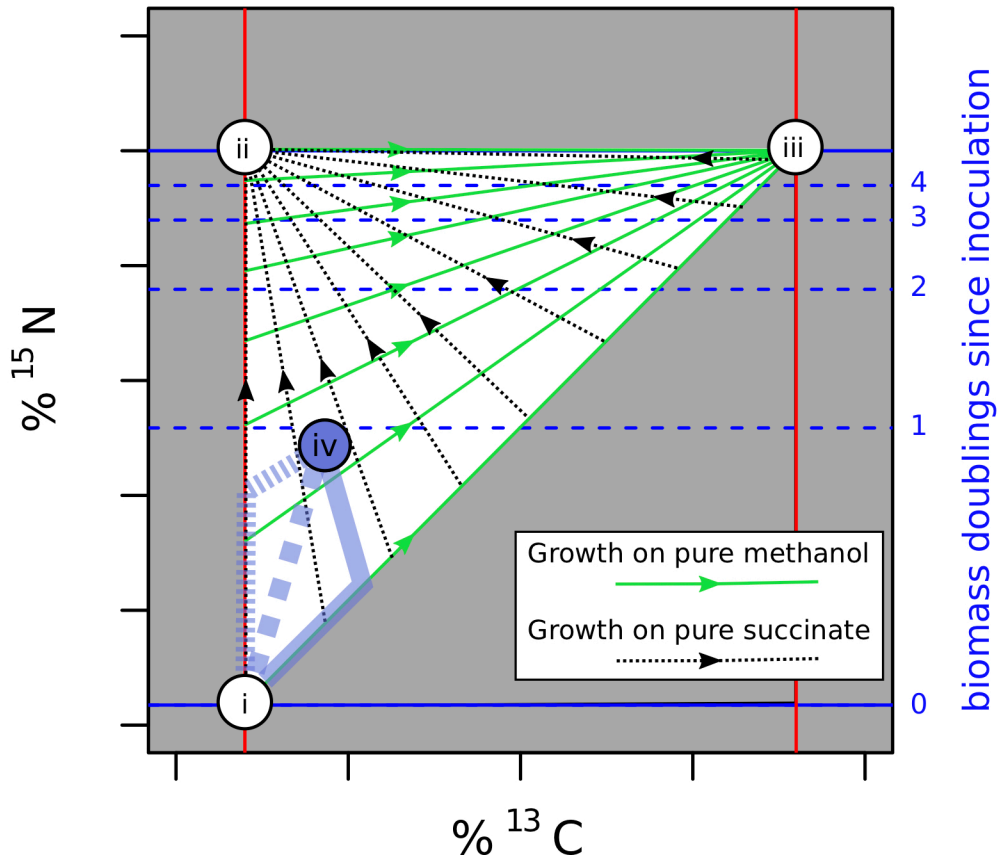

Supplement: mBio.01519-19-sf001.pdf [file mBio.01519-19-sf001.pdf]
